# Supplementary material for: Novel bio-based flexible epoxy resin from diglycidyl ether of bisphenol A cured with castor oil maleate
Source: Royal Society of Chemistry journal article supplement (doi:10.1039/c5ra05610a), 2015-01-01
Supplement: c5ra05610a1.pdf [file c5ra05610a1.pdf]

## **Novel bio-based flexible epoxy resin from diglycidyl ether of bisphenol A cured with castor oil maleate**

**Dan Rosu<sup>a</sup>, Fanica Mustata<sup>b\*</sup>, Nita Tudorachi<sup>b</sup>, Valentina Elena Musteata<sup>b</sup>, Liliana Rosu<sup>a</sup>, Cristian–Dragos Varganici<sup>a</sup>**

*<sup>a</sup>Centre of Advanced Research in Bionanoconjugates and Biopolymers, "Petru Poni" Institute of Macromolecular Chemistry, 41A Gr. Ghica-Voda Alley, 700487 Iasi, Romania*

*<sup>b</sup>"Petru Poni" Institute of Macromolecular Chemistry, 41A Gr. Ghica-Voda Alley, 700487 Iasi, Romania*

Dan Rosu  
drosu@icmpp.ro; dan\_rosu50@yahoo.com

Nita Tudorachi  
ntudor@icmpp.ro

**Fanica Mustata\***

"Petru Poni" Institute of Macromolecular Chemistry, Aleea Grigore Ghica Voda, No.41 A, Iasi 700487, Romania

Phone: +40 232 217 454

Fax: +40 232 211 299

E-mail addresses: fmustata@icmpp.ro  
fanicamustata@yahoo.com

Valentina Elena Musteata  
valentina.musteata@icmpp.ro

Liliana Rosu  
lrosu@icmpp.ro

Cristian–Dragos Varganici  
varganici.cristian@icmpp.ro

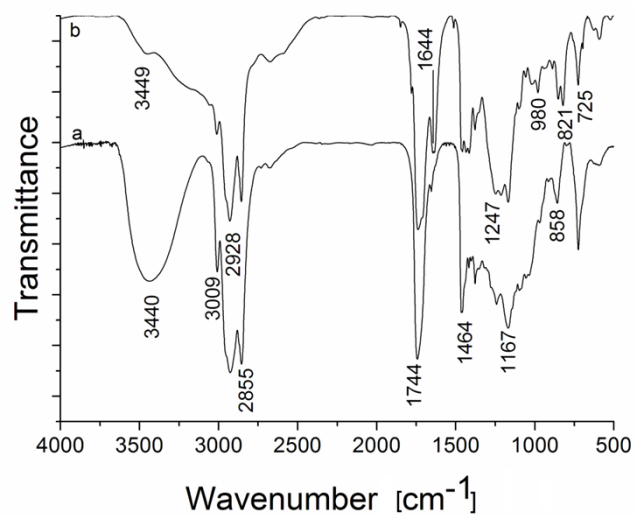

**Fig. S1.** FTIR spectra of CO (a) and COMA (b).

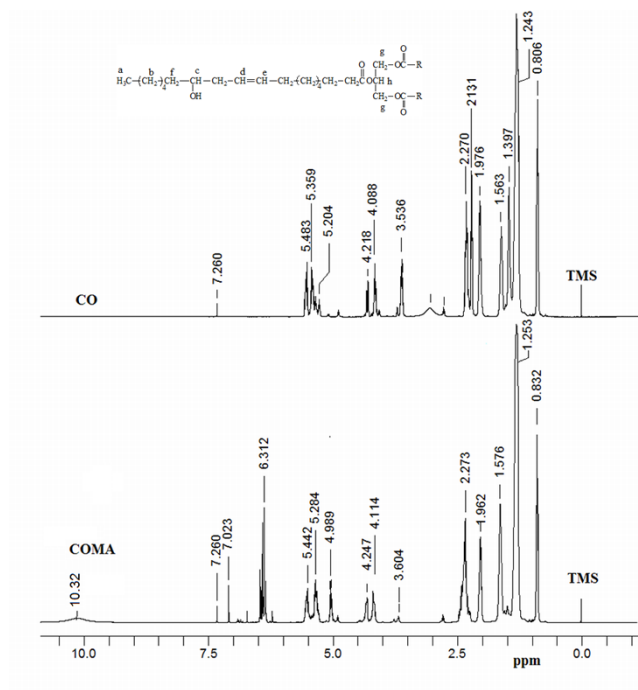

**Fig. S2.**  $^1\text{H}$ -NMR spectra of CO and COMA.

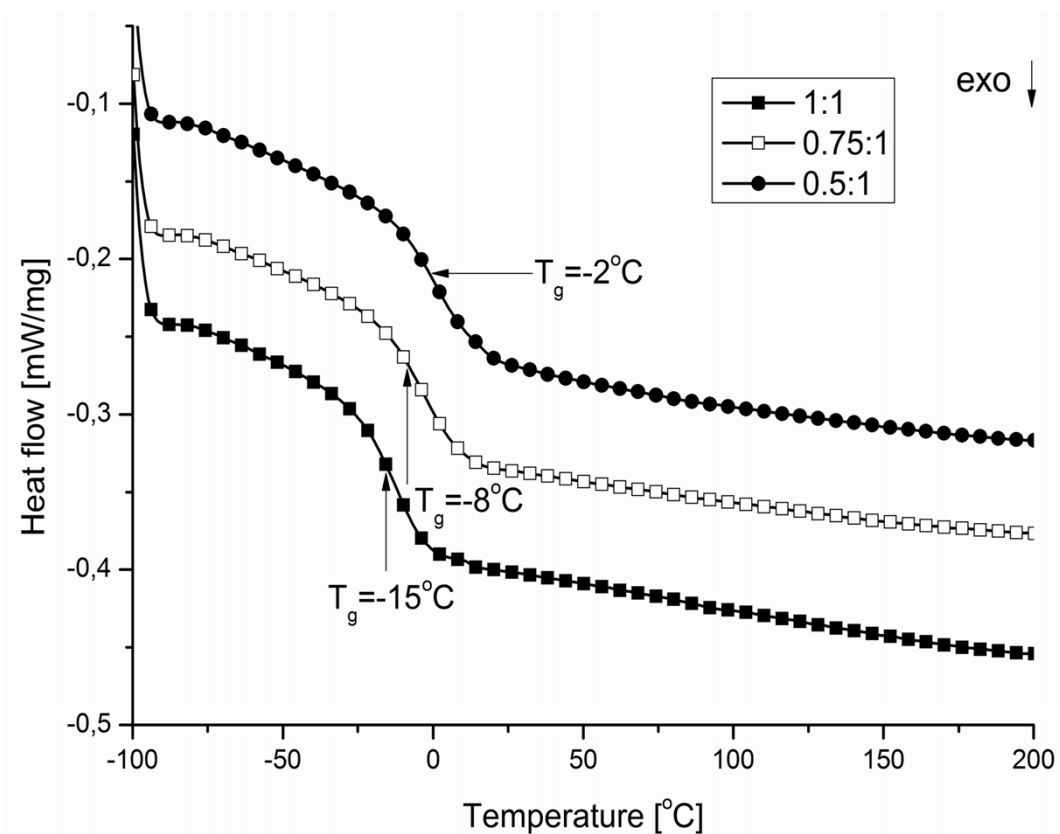

**Fig. S3.** DSC heating curves

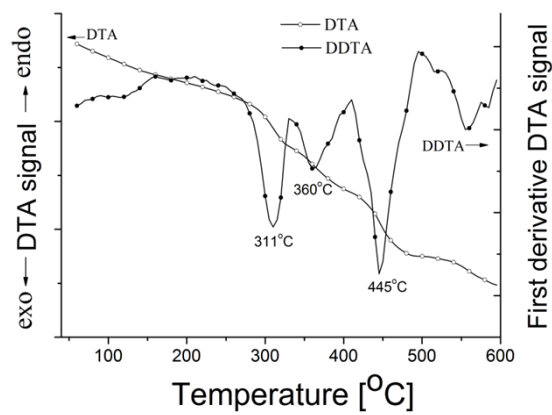

**Fig. S4.** DTA and DDTA curves of the studied sample.

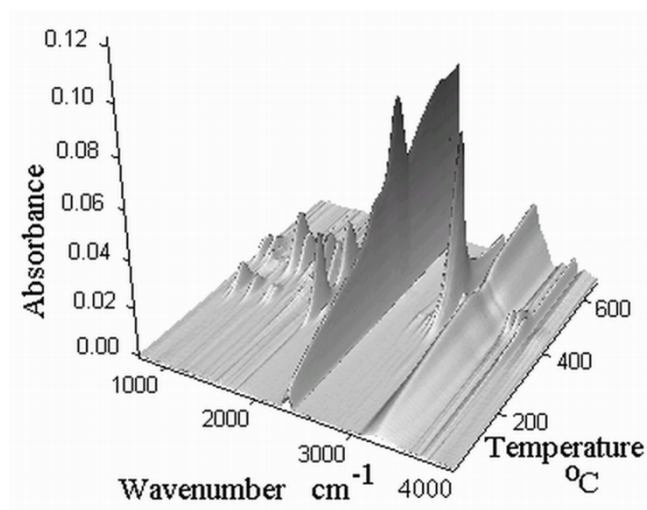

**Fig. S5.** FTIR 3D plot of evolved gaseous compounds.

**Table S1.** Some data evaluated from TG and DTG curves.

| Heating rate<br>(°C min <sup>-1</sup> ) | $T_{5\%}$<br>(°C) | $T_{50\%}$<br>(°C) | $T_{mI}$<br>(°C) | $W_{mI}$<br>(%) | $T_{mII}$<br>(°C) | $W_{mII}$<br>(%) | $T_f$<br>(°C) | $T_f - T_i$<br>(°C) | $W_{rez}$<br>(%) |
|-----------------------------------------|-------------------|--------------------|------------------|-----------------|-------------------|------------------|---------------|---------------------|------------------|
| 5                                       | 299               | 407                | 288              | 3.6             | 414               | 57               | 540           | 241                 | 4.1              |
| 7.5                                     | 312               | 418                | 298              | 3.2             | 416               | 47               | 540           | 228                 | 8.6              |
| 10                                      | 320               | 420                | 312              | 3.9             | 423               | 51               | 540           | 220                 | 7.1              |

$T_{5\%}$  - temperature corresponding to 5% mass loss;

$T_{50\%}$  - temperature corresponding to 50% mass loss;

$T_{mI}$ ,  $T_{mII}$  - temperatures corresponding to the maximum thermal degradation rates (i.e. first derivative curve peak temperatures);

$W_{mI}$ ,  $W_{mII}$  - mass loss corresponding to  $T_{mI}$  and  $T_{mII}$  values;

$T_f$  - final thermal decomposition temperature;

$T_f - T_i$  - thermal decomposition range;

$W_{rez}$  = amount of residue remained at the end of the thermal degradation process (600°C).

**Table S2.** Reaction types and conversion functions  $f(e, p)$ , where:  $e$  = start concentration of the reactant and  $p$  = concentration of the final product.

| Reactions type                                                         | code     | $f(e,p)$                                 |
|------------------------------------------------------------------------|----------|------------------------------------------|
| First-order reaction                                                   | F1       | $e$                                      |
| Second-order reaction                                                  | F2       | $e^2$                                    |
| $n^{\text{th}}$ -order reaction                                        | F $n$    | $e^n$                                    |
| Two-dimensional phase boundary                                         | R2       | $2 \cdot e^{0.5}$                        |
| Three-dimensional phase boundary reaction                              | R3       | $3 \cdot e^{0.67}$                       |
| One-dimensional diffusion                                              | D1       | $0.5/(1-e)$                              |
| Two-dimensional diffusion                                              | D2       | $-1/\ln(e)$                              |
| Three-dimensional diffusion (Jander's type)                            | D3       | $1.5 \cdot e^{0.33} (e^{-0.33} - 1)$     |
| Four-dimensional diffusion (Ginstling–Brounstein type)                 | D4       | $1.5 / (e^{-0.33} - 1)$                  |
| Simple Prout–Tompkins equation                                         | B1       | $e \cdot p$                              |
| Expanded Prout–Tompkins equation                                       | B $n$ a  | $e^n \cdot p^a$                          |
| First-order reaction with autocatalysis                                | C1-X     | $e \cdot (1 + K_{\text{cat}} \cdot X)$   |
| Through the reactands, X                                               | C $n$ -X | $e^n \cdot (1 + K_{\text{cat}} \cdot X)$ |
| Two-dimensional nucleation                                             | A2       | $2 \cdot e \cdot [-\ln(e)]^{0.5}$        |
| Three-dimensional nucleation                                           | A3       | $3 \cdot e \cdot [-\ln(e)]^{0.67}$       |
| $n$ -Dimensional nucleation/nucleus growth according to Avrami/Erofeev | A $n$    | $n \cdot e [-\ln(e)]^{(n-1)/n}$          |

**Table S3.** Lifetime prediction from thermochemical data.

| Temperature [°C] | Lifetime for 5% mass loss [h] | Lifetime for 10% mass loss [h] |
|------------------|-------------------------------|--------------------------------|
| 130              | 3000                          | 13000                          |
| 135              | 1833                          | 8333                           |
| 140              | 1217                          | 5333                           |
| 145              | 783                           | 3500                           |
| 150              | 516                           | 2166                           |
| 155              | 333                           | 1483                           |
| 160              | 217                           | 1000                           |
| 165              | 153                           | 666                            |
| 170              | 104                           | 450                            |
| 175              | 71                            | 316                            |
| 180              | 49                            | 200                            |
| 185              | 34                            | 150                            |
| 190              | 24                            | 105                            |
| 195              | 17                            | 74                             |
| 200              | 12                            | 53                             |
